# Supplementary material for: Incremental cost of nosocomial bacteremia according to the focus of infection and antibiotic sensitivity of the causative microorganism in a university hospital
Source: PubMed Central journal article supplement — Medicine (Baltimore). 2017 Apr 28;96(17):e6645. doi: 10.1097/MD.0000000000006645 (PMC5413229; doi:10.1097/md.0000000000006645), 2017-04-28
Supplement: medi-96-e6645-s001.pdf [file medi-96-e6645-s001.pdf]

**Figure 1. Bias reduction among explanatory variables after propensity-score matching.**

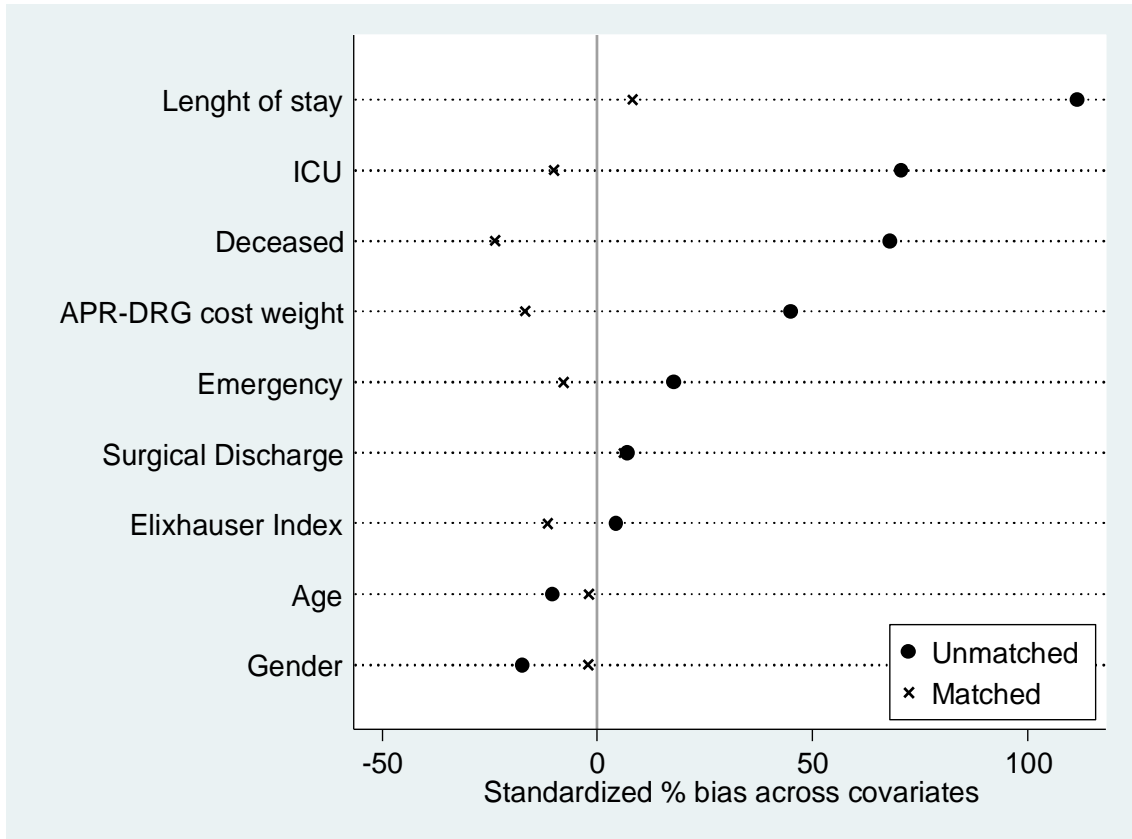

**Table 1. GLM (binomial family and logit link) model for the estimation of propensity score. The dependent variables is the episode of bacteremia.**

|                                          | Coef.     | Std. Err. | z     | P>z   | [95% Conf. Interval] |
|------------------------------------------|-----------|-----------|-------|-------|----------------------|
| Length of stay                           | 0.0727474 | 0.0025866 | 28.12 | 0     | 0.0676777 0.0778171  |
| Log (Pre-bacteremia cost)                | 1.495.091 | 0.0693931 | 21.55 | 0     | 1.631.098 1.359.083  |
| Age                                      | 0.0053662 | 0.0028081 | -1.91 | 0.056 | -0.01087 0.0001377   |
| Log (APR-DRG adjacent group cost weight) | 0.6110629 | 0.0955102 | 6.4   | 0     | 0.4238663 0.7982595  |
| Discharge type (1=Surgical)              | 0.1869841 | 0.131955  | 1.42  | 0.156 | -0.071643 0.4456113  |
| Elixhauser index                         | 0.0264021 | 0.0274932 | -0.96 | 0.337 | 0.0802879 0.0274836  |
| Gender (1=Female)                        | 0.2223457 | 0.095288  | -2.33 | 0.02  | 0.4091068 0.0355846  |
| Emergency (1=yes)                        | 0.2847335 | 0.1131221 | -2.52 | 0.012 | 0.5064488 0.0630183  |
| Deceased (1=yes)                         | 1.803.327 | 0.1136873 | 15.86 | 0     | 1.580.504 202.615    |
| ICU (1=yes)                              | 2.096.147 | 0.1395959 | 15.02 | 0     | 1.822.544 236.975    |
| Constant                                 | 6.673.143 | 0.5754832 | 11.6  | 0     | 5.545.217 7.801.069  |

**Table 2. Distribution by Focus of Bacteremia According to the Causative Organism and its Antibiotic Sensitivity**

| Source of bacteremia                    | Microorganism group |                |                      |                      |               | Total      |
|-----------------------------------------|---------------------|----------------|----------------------|----------------------|---------------|------------|
|                                         | <i>S. aureus</i>    | <i>E. coli</i> | <i>K. pneumoniae</i> | <i>P. aeruginosa</i> | Polimicrobial |            |
| Urinary tract infection (MDSM)          | 1                   | 64             | 15                   | 8                    | 6             | 94         |
| Urinary tract infection (MDRM)          | 0                   | 19             | 11                   | 10                   | 2             | 42         |
| Gastrointestinal tract infection (MDSM) | 1                   | 42             | 18                   | 6                    | 14            | 81         |
| Gastrointestinal tract infection (MDRM) | 0                   | 12             | 1                    | 3                    | 5             | 21         |
| Primary and unknown (MDSM)              | 12                  | 13             | 7                    | 9                    | 18            | 59         |
| Primary and unknown (MDRM)              | 10                  | 3              | 4                    | 6                    | 3             | 26         |
| Respiratory tract infection (MDSM)      | 10                  | 7              | 10                   | 19                   | 4             | 50         |
| Respiratory tract infection (MDRM)      | 8                   | 2              | 7                    | 9                    | 2             | 28         |
| Endovascular devices (MDSM)             | 16                  | 3              | 11                   | 4                    | 15            | 49         |
| Endovascular devices (MDRM)             | 9                   | 2              | 5                    | 4                    | 9             | 29         |
| Surgical site infection (MDSM)          | 14                  | 11             | 6                    | 2                    | 11            | 44         |
| Surgical site infection (MDRM)          | 3                   | 1              | 4                    | 2                    | 1             | 11         |
| Others (MDSM)                           | 16                  | 5              | 2                    | 3                    | 1             | 27         |
| Others (MDRM)                           | 8                   | 0              | 1                    | 1                    | 0             | 10         |
| <b>Total</b>                            | <b>108</b>          | <b>184</b>     | <b>102</b>           | <b>86</b>            | <b>91</b>     | <b>571</b> |

**NOTE:** MDSM, multidrug-sensitive microorganism; MDRM, multidrug-resistant microorganism.

CI: Confidence interval

**Table 3.**  
**Mean values for fixed, variable and drug costs, according to the focus of bacteremia and antibiotic susceptibility of the causative organism**

| Source of bacteremia                    | Pre-bacteremia stage |          |       | Post-bacteremia stage |          |       |
|-----------------------------------------|----------------------|----------|-------|-----------------------|----------|-------|
|                                         | Fixed                | Variable | Drugs | Fixed                 | Variable | Drugs |
| Urinary tract infection (MDSM)          | 7.257                | 1.424    | 814   | 6.201                 | 886      | 822   |
| Urinary tract infection (MDRM)          | 8.749                | 1.803    | 1.414 | 8.893                 | 1.138    | 1.462 |
| Gastrointestinal tract infection (MDSM) | 6.025                | 1.302    | 867   | 10.480                | 1.845    | 1.642 |
| Gastrointestinal tract infection (MDRM) | 9.407                | 2.328    | 1.031 | 5.829                 | 1.843    | 1.550 |
| Primary and unknown (MDSM)              | 10.081               | 2.392    | 2.569 | 8.055                 | 1.190    | 1.816 |
| Primary and unknown (MDRM)              | 10.807               | 1.853    | 2.714 | 9.126                 | 1.520    | 3.419 |
| Respiratory tract infection (MDSM)      | 14.413               | 2.532    | 1.859 | 19.347                | 2.223    | 3.128 |
| Respiratory tract infection (MDRM)      | 14.739               | 2.133    | 1.518 | 9.971                 | 1.403    | 1.659 |
| Endovascular devices (MDSM)             | 8.661                | 1.169    | 1.306 | 9.924                 | 1.274    | 1.874 |
| Endovascular devices (MDRM)             | 13.250               | 2.131    | 2.545 | 12.794                | 1.506    | 2.959 |
| Surgical site infection (MDSM)          | 9.769                | 2.101    | 878   | 13.017                | 1.843    | 2.232 |
| Surgical site infection (MDRM)          | 10.790               | 1.763    | 2.878 | 13.798                | 2.134    | 2.134 |
| Others (MDSM)                           | 4.952                | 1.138    | 161   | 7.801                 | 1.116    | 1.072 |
| Others (MDRM)                           | 5.589                | 750      | 473   | 11.452                | 821      | 2.799 |

**NOTES:** MDSM, multidrug-sensitive microorganism; MDRM, multidrug-resistant microorganism.  
 CI: Confidence interval.

The drug cost are specifically detailed given its relevance with the object of this study,
